# Supplementary material for: Efficient Generation of Microdroplets Using Tail Breakup Induced with Multi-Branch Channels
Source: MDPI journal article supplement (doi:10.3390/molecules26123707), 2021-06-17
Supplement: s1 [file s1]

# Supplementary Materials

## Efficient Generation of Microdroplets Using Tail Breakup Induced with Multi-Branch Channels

Daiki Tanaka <sup>1,\*</sup>, Satsuki Kajiya <sup>2</sup>, Seito Shijo <sup>2</sup>, Dong Hyun Yoon <sup>1</sup>, Masahiro Furuya <sup>2</sup>, Yoshito Nozaki <sup>1</sup>, Hiroyuki Fujita <sup>3</sup>, Tetsushi Sekiguchi <sup>1</sup> and Shuichi Shoji <sup>2</sup>

<sup>1</sup> Research Organization for Nano & Life Innovation, Waseda University, 513 Wasedatsurumakicho, Shinjuku-ku, Tokyo 162-0041, Japan; yoon@shoji.comm.waseda.ac.jp (D.H.Y.); y.nozaki@aoni.waseda.jp (Y.N.); t-sekiguchi@waseda.jp (T.S.)

<sup>2</sup> Department of Electronic and Physical Systems, School of Fundamental Science and Engineering, Waseda University, 3-4-1 Okubo, Shin-juku-ku, Tokyo 145-0065, Japan; kajiya@shoji.comm.waseda.ac.jp (S.K.); shijo@shoji.comm.waseda.ac.jp (S.S.); furuya@aoni.waseda.jp (M.F.); shojis@waseda.jp (S.S.)

<sup>3</sup> Canon Medical Systems Corporation, 1385 Shimoishigami, Otawara-shi, Tochigi 324-8550, Japan; hiroyuki12.fujita@medical.canon

\* Correspondence: d.tanaka@ruri.waseda.jp; Tel.: +81-3-3204-5765

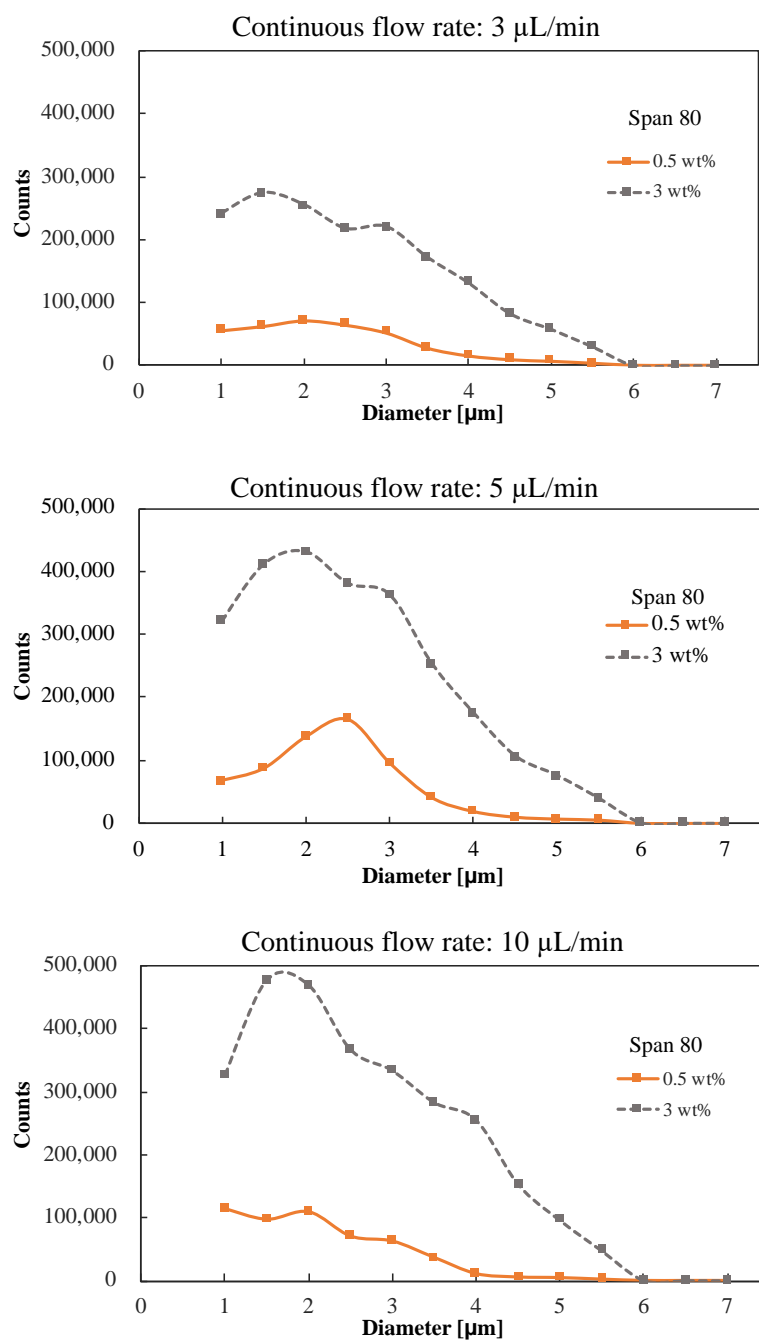

**Figure S1.** Varying the concentration of surfactant in the continuous flow.
